# Supplementary material for: Inequality-Related Health and Social Factors and Their Impact on Well-Being during the COVID-19 Pandemic: Findings from a National Survey in the UK
Source: MDPI journal article supplement (doi:10.3390/ijerph18031014), 2021-01-24
Supplement: s1 [file s1]

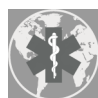

**Table S1.** Weighted frequency distributions, means and standard deviations of Cantril Ladder scores.

|                                                         |                                         | <b>n (%)</b> | <b>Cantril Ladder score<br/>§</b> | <b>p-value §§</b> |
|---------------------------------------------------------|-----------------------------------------|--------------|-----------------------------------|-------------------|
| Gender                                                  | Male                                    | 2,472 (46.7) | 6.11 ± 2.01                       | 0.53              |
|                                                         | Female                                  | 2,605 (53.3) | 6.15 ± 1.97                       |                   |
| Household size                                          | Single person                           | 906 (17.9)   | 5.89 ± 1.87                       | <0.01             |
|                                                         | 2 to 4 persons                          | 3,680 (72.5) | 6.28 ± 1.92                       |                   |
|                                                         | 5 persons or more                       | 390 (7.7)    | 5.76 ± 2.12                       |                   |
|                                                         | Don't know                              | 101 (1.9)    | 4.94 ± 7.12                       |                   |
| Occupation                                              | Work at home                            | 1,819 (35.8) | 6.27 ± 1.70                       | <0.01             |
|                                                         | Elementary occupations <sup>a</sup>     | 193 (3.8)    | 5.98 ± 1.85                       |                   |
|                                                         | Logistics and transport <sup>b</sup>    | 103 (2.0)    | 5.92 ± 1.77                       |                   |
|                                                         | Health and social care <sup>c</sup>     | 232 (4.6)    | 6.23 ± 1.92                       |                   |
|                                                         | Safety and social services <sup>d</sup> | 114 (2.3)    | 6.44 ± 1.68                       |                   |
|                                                         | Others <sup>e</sup>                     | 262 (5.2)    | 6.18 ± 1.77                       |                   |
|                                                         | Prefer not to tell                      | 2,354 (46.4) | 6.01 ± 2.23                       |                   |
| Cardiometabolic or<br>respiratory diseases <sup>f</sup> | Yes                                     | 1,727 (34.0) | 6.12 ± 2.05                       | <0.05             |
|                                                         | None                                    | 3,350 (66.0) | 6.16 ± 1.94                       |                   |
| Mental health conditions                                | Yes                                     | 620 (12.2)   | 4.88 ± 2.12                       | <0.01             |
|                                                         | None                                    | 4,457 (87.8) | 6.33 ± 1.89                       |                   |
| Others diseases <sup>g</sup>                            | Yes                                     | 888 (17.5)   | 6.14 ± 1.94                       | 0.06              |
|                                                         | None                                    | 4,189 (82.5) | 6.15 ± 2.14                       |                   |
| COVID-19 symptoms <sup>h</sup>                          | Yes                                     | 336 (6.6)    | 5.64 ± 2.14                       | <0.01             |
|                                                         | None                                    | 4,644 (91.5) | 6.18 ± 1.97                       |                   |
|                                                         | Prefer not to tell                      | 97 (1.9)     | 5.40 ± 2.17                       |                   |
| Confirmed COVID-19 infec-<br>tion                       | Yes                                     | 10 (0.2)     | 6.14 ± 1.98                       | <0.01             |
|                                                         | No                                      | 4,999 (98.5) | 7 ± 2.70                          |                   |
|                                                         | Prefer not to tell                      | 68 (1.3)     | 5.34 ± 2.25                       |                   |
| Social distancing <sup>i</sup>                          | Adhered to guidelines                   | 3,090 (60.9) | 6.11 ± 2.01                       | 0.35              |
|                                                         | Not adhered                             | 1,987 (39.1) | 6.16 ± 1.9                        |                   |

§ Cantril Ladder score (min–max: 0–10). Higher score indicates better general well-being, expressed as mean ± standard deviation. §§ Kruskal–Wallis mean ranks test (>2 group comparison) or Mann–Whitney U test (2 group comparison); a: construction, manufacture, and food retail; b: logistics, delivery services, and public transport; c: healthcare and social care; d: policing, prisons, and schools; e: other unspecified occupations that require working away from home; f: asthma, chronic obstructive pulmonary disease (COPD), cystic fibrosis, heart diseases, high blood pressure, high cholesterol or diabetes; g: cancer, AIDS/HIV, epilepsy, multiple sclerosis or arthritis; h: experiencing newly developed symptoms of any of the following: dry cough, fever, loss of sense of smell or taste, shortness of breath or breathing difficulty; i: measured by asking if respondents have been in close contact with people outside their households during the lockdown period. Positive responses were regarded as not adhered to guidelines.
